# Supplementary material for: A Defined Antigen Skin Test for Diagnosis of Bovine Tuberculosis in Domestic Water Buffaloes (Bubalus bubalis)
Source: Front Vet Sci. 2021 Aug 16;8:669898. doi: 10.3389/fvets.2021.669898 (PMC8418101; doi:10.3389/fvets.2021.669898)
Supplement: Supplementary file 1 [file Table_1.xlsx]

## Sheet: Sheet1
Nomenclature	Peptide sequence
ESAT6-1	MTEQQWNFAGIEAAASAIQGNVTSIHSLLDEGKQSLTKLA
ESAT6-2	NVTSIHSLLDEGKQSLTKLAAAWGGSGSEAYQGVQQKWDA
ESAT6-3	AAWGGSGSEAYQGVQQKWDATATELNNALQNLARTISEAG
ESAT6-4	TATELNNALQNLARTISEAGQAMASTEGNVTGMFA
CFP10-1	MAEMKTDAATLAQEAGNFERISGDLKTQIDQVESTAGSLQ
CFP10-2	ISGDLKTQIDQVESTAGSLQGQWRGAAGTAAQAAVVRFQE
CFP10-2	GQWRGAAGTAAQAAVVRFQEAANKQKQELDEISTNIRQAG
CFP10-4	AANKQKQELDEISTNIRQAGVQYSRADEEQQQALSSQMGF
Rv3615c-1	MTENLTVQPERLGVLASHHDNAAVDASSGVEAAAGLGESV
Rv3615c-2	AAGLGESVAITHGPYCSQFN
Rv3615c-3	AITHGPYCSQFNDTLNVYLTAHNALGSSLHTAGVDLAKSL
Rv3615c-4	AHNALGSSLHTAGVDLAKSLRIAAKIYSEADEAWRKAIDG
Rv3615c-5	RIAAKIYSEADEAWRKAIDGLFT
